# Supplementary material for: A Joint Location-Scale Test Improves Power to Detect Associated SNPs, Gene Sets, and Pathways
Source: PubMed Central journal article supplement — Am J Hum Genet. 2015 Jul 2;97(1):125–38. doi: 10.1016/j.ajhg.2015.05.015 (PMC4572492; doi:10.1016/j.ajhg.2015.05.015), 2015-07-02
Supplement: mmc1.pdf [file mmc1.pdf]

The American Journal of Human Genetics

Supplemental Data

## **A Joint Location-Scale Test Improves Power to Detect Associated SNPs, Gene-Sets, and Pathways**

David Soave, Harriet Corvol, Naim Panjwani, Jiafen Gong, Weili Li, Pierre-Yves Boëlle, Peter Durie, Andrew D. Paterson, Johanna M. Rommens, Lisa J. Strug, and Lei Sun

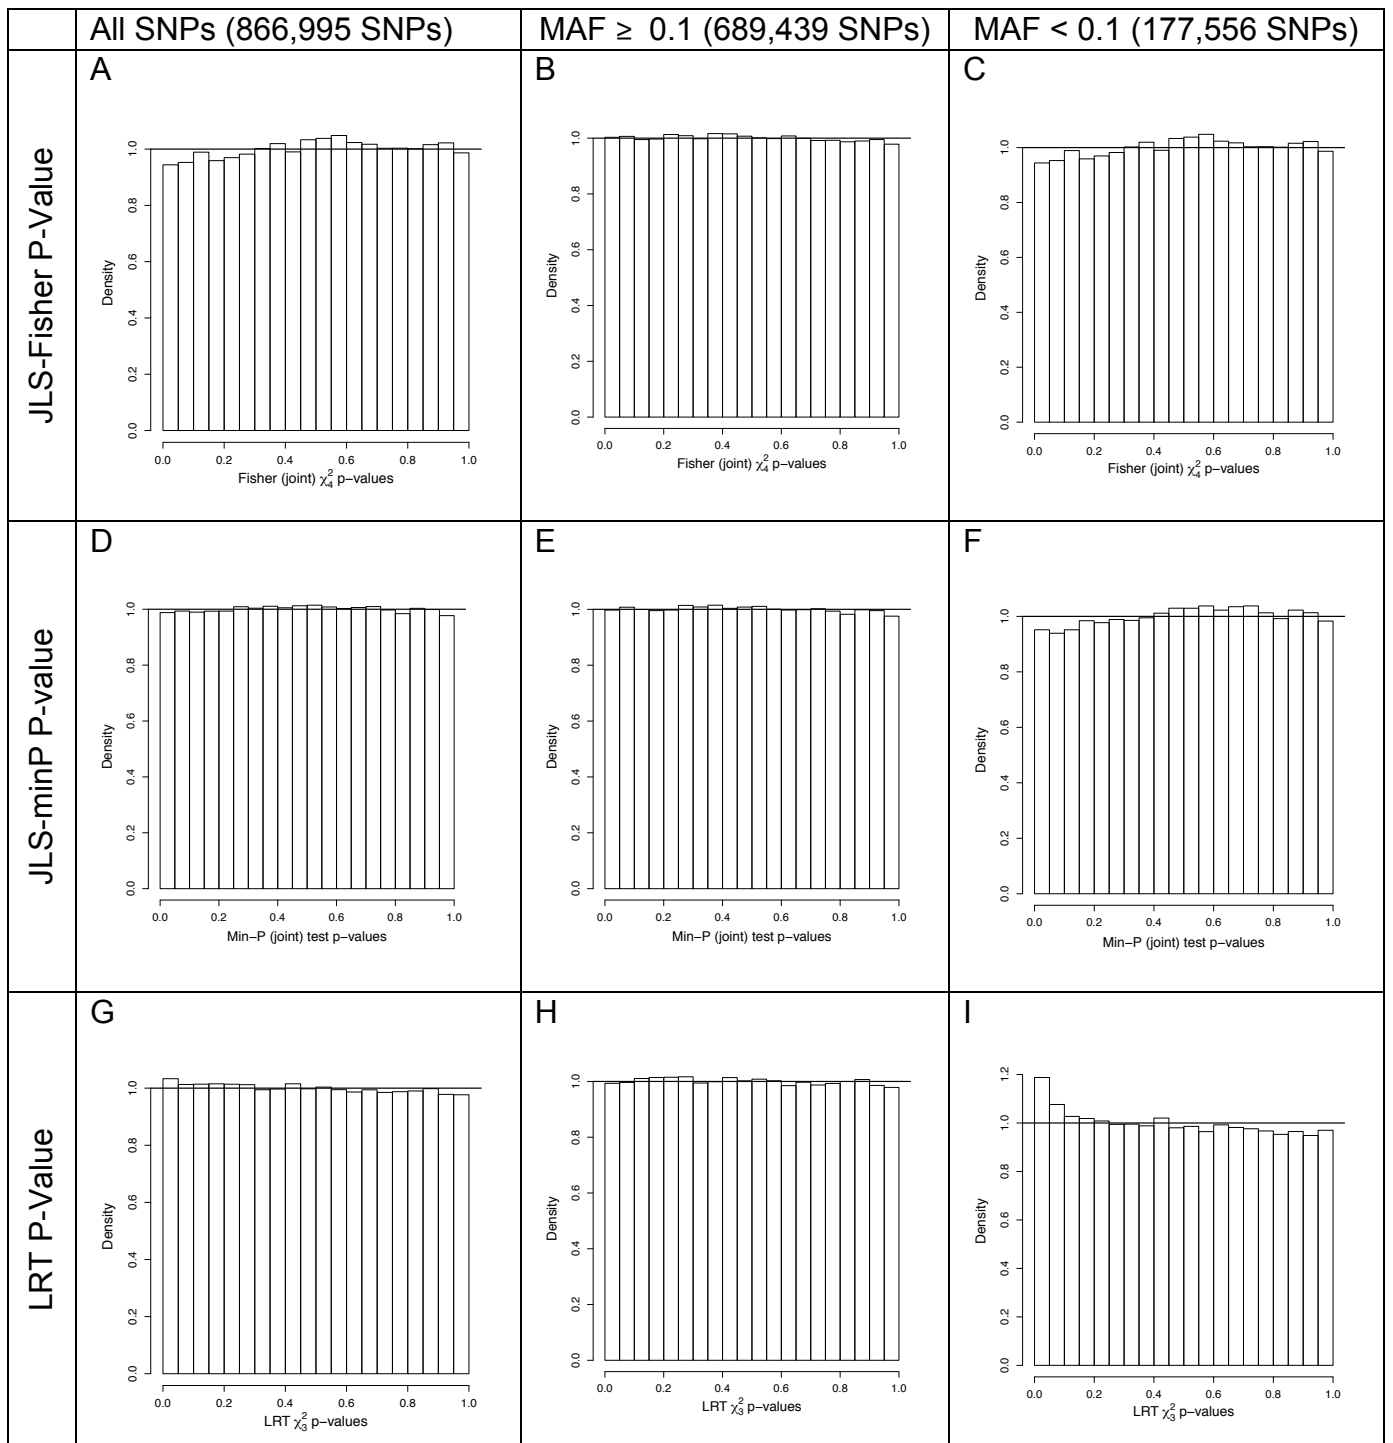

**Figure S1. Type 1 error comparison of the joint testing methods – GWAS of HbA1c in type 1 diabetes (T1D).** Following a permutation of the T1D HbA1c phenotype (Inverse Normal Transform on average of 38 quarterly measured values), GWAS was conducted on the DCCT/EDIC sample ( $n=1304$  subjects) using (A-C) the JLS-Fisher test, (D-F) the JLS-minP test and (G-I) the LRT methods, across all SNPs (A,D,G), as well as stratifying by MAF  $\geq$  0.1 (B,E,H) and MAF  $<$  0.1 (C,F,I).

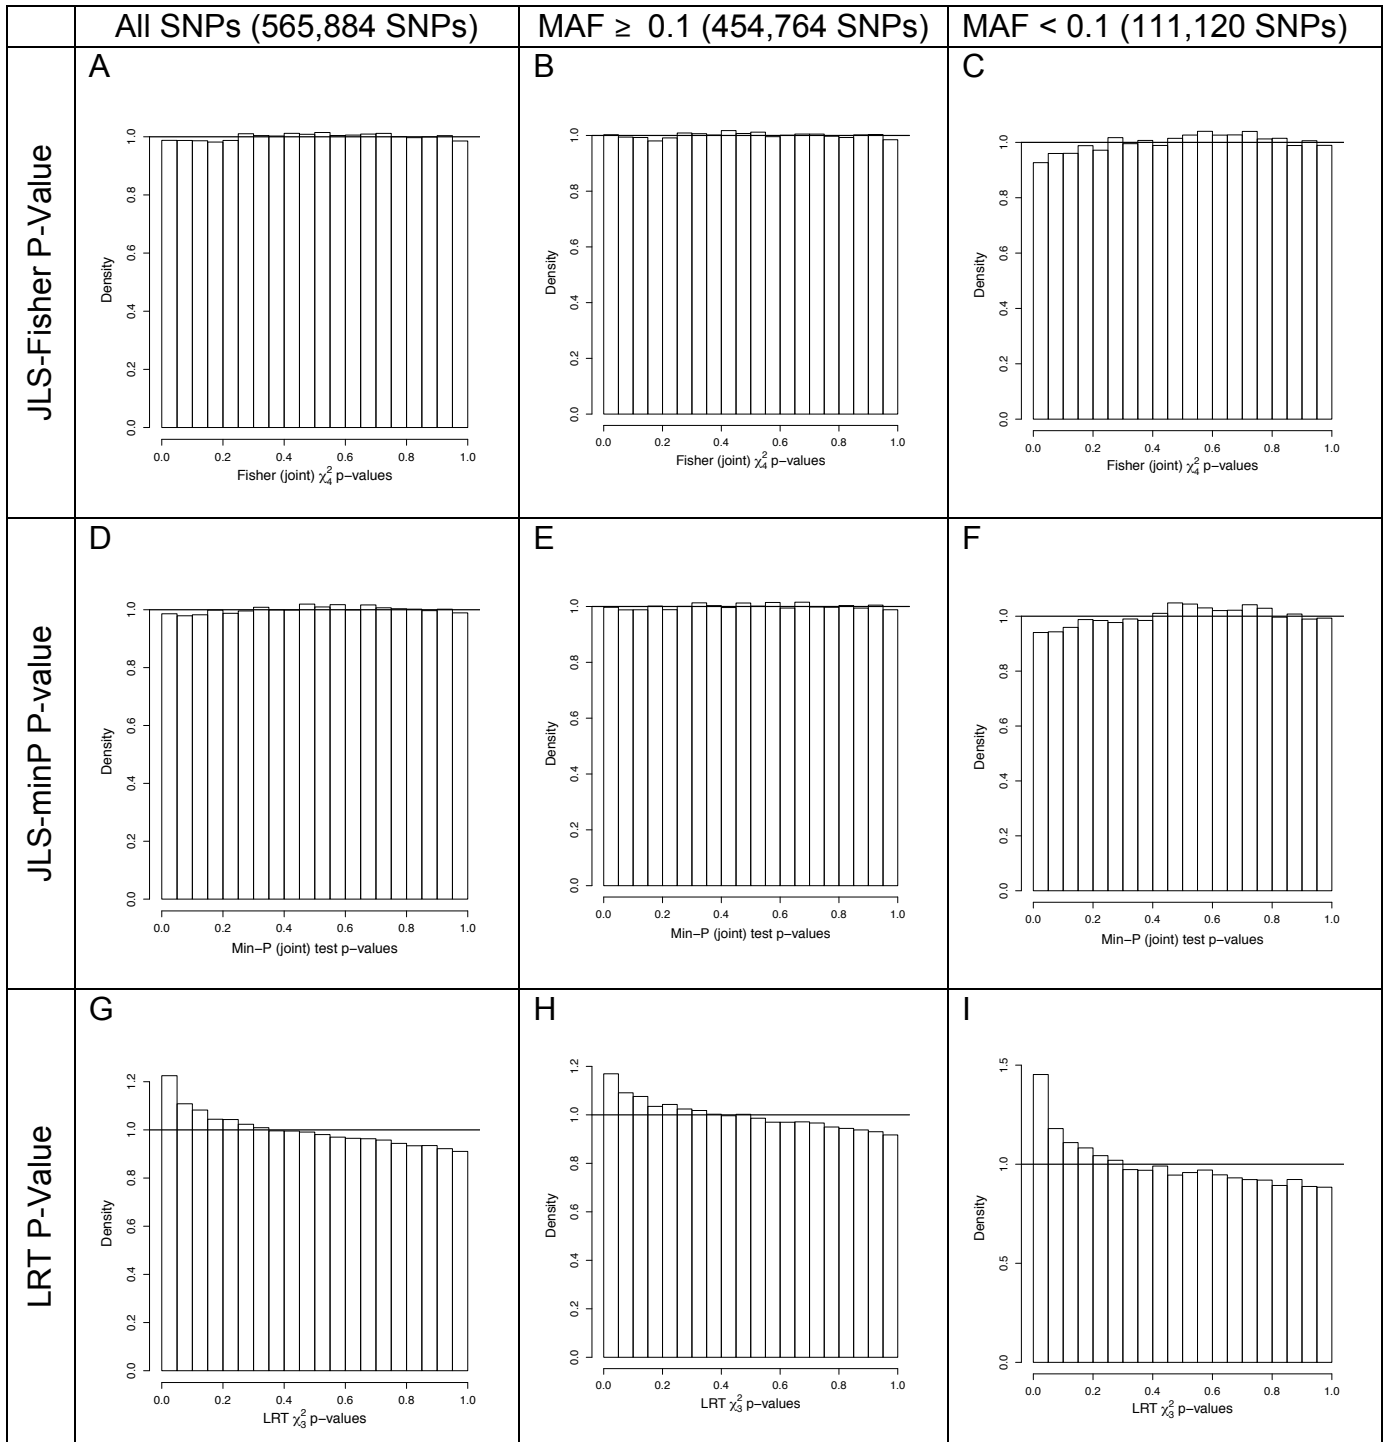

**Figure S2. Type 1 error comparison of the joint testing methods - GWAS of cystic fibrosis (CF) lung disease as measured by SaKnorm.** Following a permutation of SaKnorm in the CGS sample (n=1409 patients), GWAS was conducted using (A-C) the JLS-Fisher test, (D-F) the JLS-minP test and (G-I) the LRT methods across all SNPs (A,D,G), as well as stratifying by MAF  $\geq$  0.1 (B,E,H) and MAF < 0.1 (C,F,I).

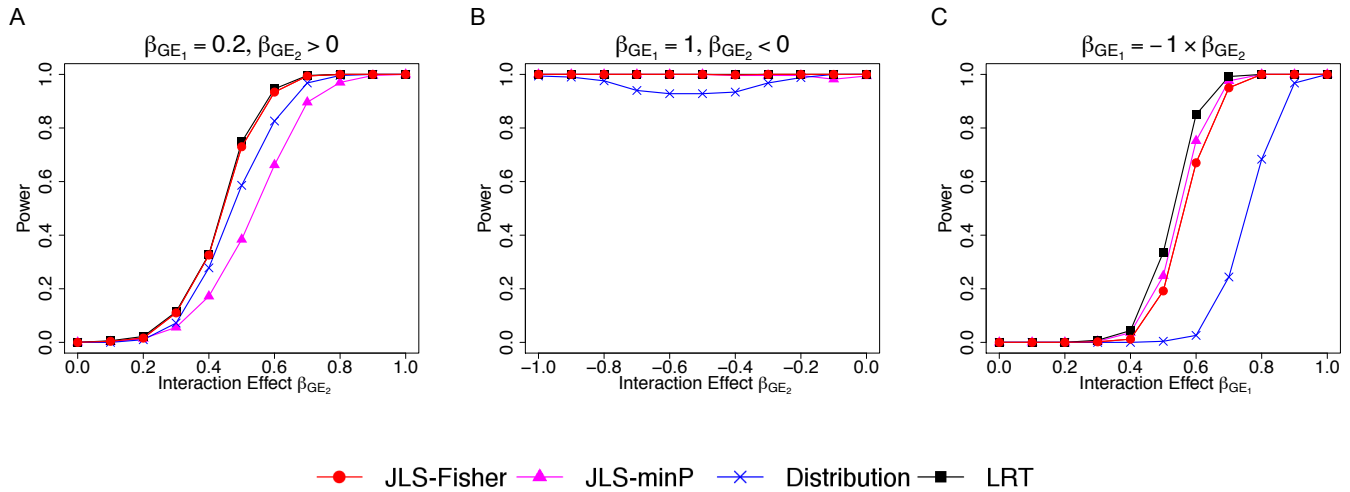

**Figure S3. Power comparison under simulation Model 2 – Proposed and competing joint location-scale testing methods.** Four different joint location-scale testing methods are examined: the proposed JLS-Fisher (red) and JLS-minP (purple) tests, and the distribution test (blue) of Aschard et al. <sup>1</sup> and the LRT (black) of Cao et al. <sup>2</sup>. Phenotype values for 2000 independent subjects were simulated under Model 2,  $E[Y] = \beta_{E1}E_1 + \beta_{E2}E_2 + \beta_{GE1}G \cdot E_1 + \beta_{GE2}G \cdot E_2$ , where the MAF of  $G$  was 0.3 and the exposure variables  $E_1$  and  $E_2$  were simulated as Bernoulli variables with frequency=0.3. The effect of the exposure  $E_1$ ,  $\beta_{E1}$ , was fixed at 0.3 while the interaction effect  $\beta_{GE1}$  varied. The effect of exposure  $E_2$ ,  $\beta_{E2}$ , was fixed at 0.3 when the interaction effect  $\beta_{GE2}$  was positive, and -0.3 when  $\beta_{GE2}$  was negative. Results are presented for models when effects of the two interaction effects,  $\beta_{GE1}$  and  $\beta_{GE2}$ , are in the same direction (A), and when the two interaction effects are in opposite direction having different amplitude (B) or the same amplitude (C). Power was calculated at the  $5 \times 10^{-8}$  level based on 500 replicates. For other details see Appendix A.

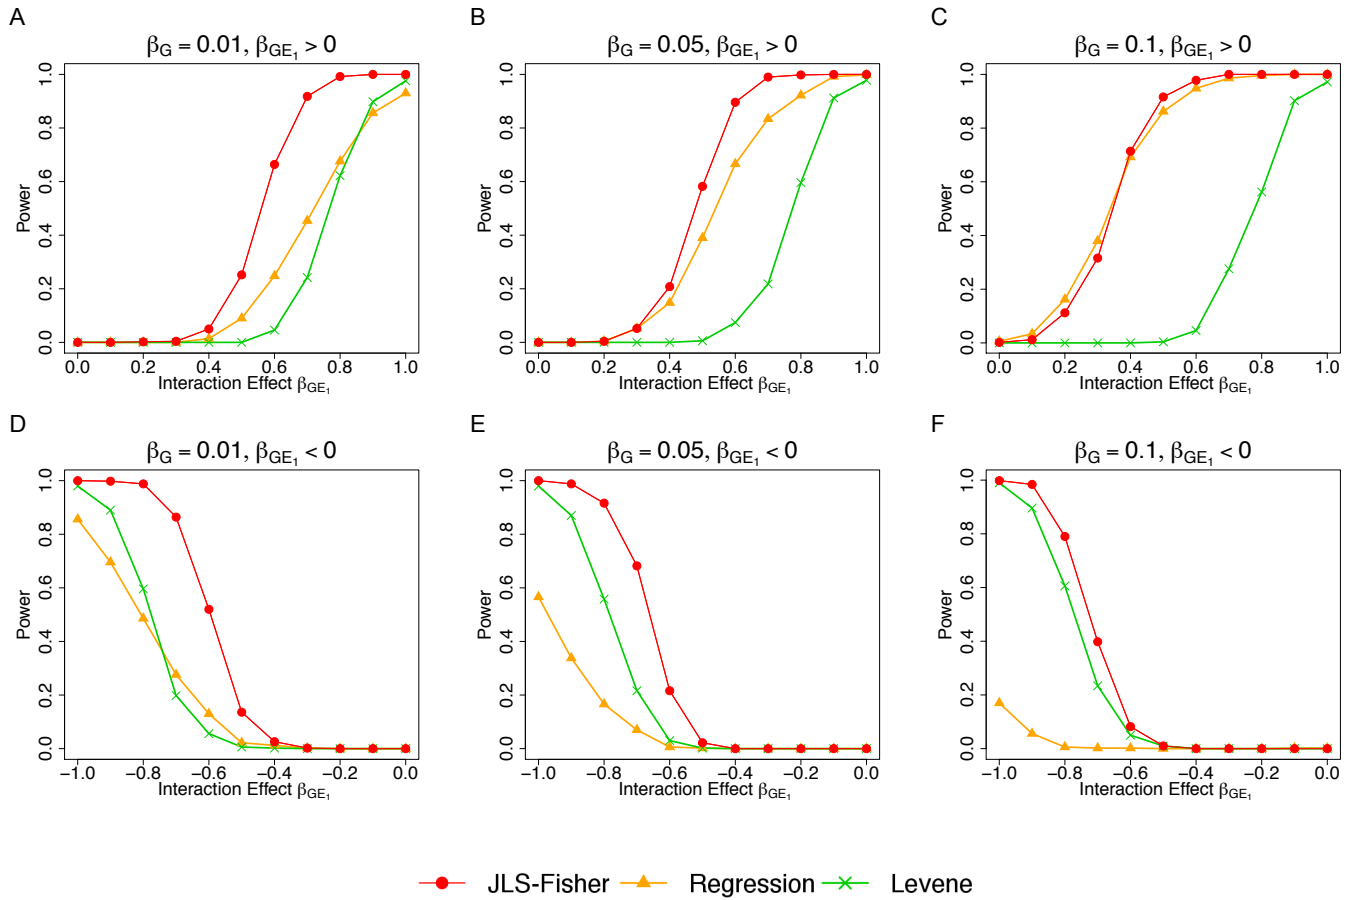

**Figure S4. Power comparison under simulation Model 1 – Proposed joint location-scale testing method and individual location-only or scale-only testing methods.** The proposed JLS-Fisher test (red) is compared to the individual regression location-only test (orange) and Levene’s scale-only test (green). Phenotype values for 2000 independent subjects were simulated under Model 1,  $E[Y] = \beta_G G + \beta_{E_1} E_1 + \beta_{GE_1} G \cdot E_1$ , where the MAF of  $G$  was 0.3 and the exposure variable  $E_1$  was simulated as a Bernoulli variable with frequency=0.3. The exposure effect  $\beta_{E_1}$  was fixed at 0.3 while the other effects vary. Top panel (A)-(C) are results when the main genetic effect  $\beta_G$  and the interaction effect  $\beta_{GE_1}$  are in the same direction, and the bottom panel (D)-(F) are results when  $\beta_G$  and  $\beta_{GE_1}$  are in opposite direction. Power was calculated at the  $5 \times 10^{-8}$  level based on 500 replicates. For other details see Appendix A.

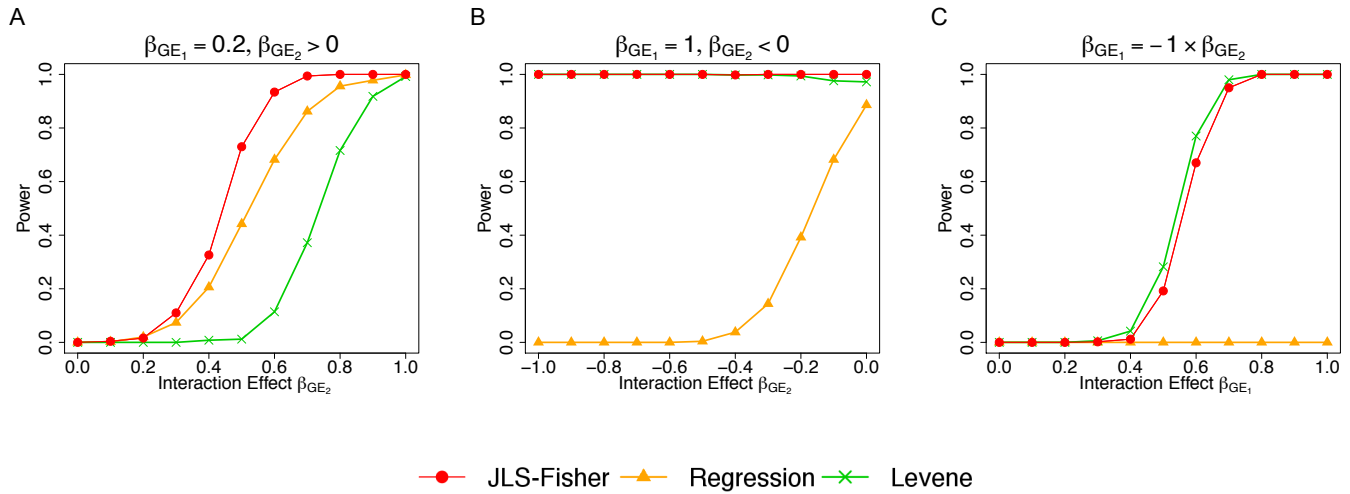

**Figure S5. Power comparison under simulation Model 2 – Proposed joint location-scale testing method and individual location-only or scale-only testing methods.** The proposed JLS-Fisher test (red) is compared to the individual regression location-only test (orange) and Levene’s scale-only test (green). Phenotype values for 2000 independent subjects were simulated under Model 2,  $E[Y] = \beta_{E_1}E_1 + \beta_{E_2}E_2 + \beta_{GE_1}G \cdot E_1 + \beta_{GE_2}G \cdot E_2$ , where the MAF of  $G$  was 0.3 and the exposure variables  $E_1$  and  $E_2$  were simulated as Bernoulli variables with frequency=0.3. The exposure effect  $\beta_{E_1}$  was fixed at 0.3 while the interaction effect  $\beta_{GE_1}$  varied. The exposure effect  $\beta_{E_2}$  was fixed at 0.3 when the interaction effect  $\beta_{GE_2}$  was positive, and -0.3 when  $\beta_{GE_2}$  was negative. Results are presented for models when the two interaction effects,  $\beta_{GE_1}$  and  $\beta_{GE_2}$ , are (A) in the same direction, and (B) when the two interaction effects are in opposite direction having different amplitude or (C) the same amplitude. Power was calculated at the  $5 \times 10^{-8}$  level based on 500 replicates. For other details see Appendix A.

**Table S1. Type 1 error comparison with varied minor allele frequency (MAF).**

Type 1 error is presented for the regression location test (Reg), Levene's scale test (Levene), the proposed JLS-Fisher and JLS-minP joint location-scale tests, and the LRT of Cao et al. <sup>2</sup>. The distribution test of Aschard et al. <sup>1</sup> has correct type 1 error by design because it is a permutation-based testing method. Phenotype values for 2,000 independent subjects were simulated under the null model with no genetic association (Model 1 with  $\beta_G = 0, \beta_E = 0, \beta_{GE} = 0$ ) and varied MAF (0.03-0.3) with residual variation from a normal distribution with mean 0 and standard deviation 1. Empirical type 1 error rates were calculated at the 0.05, 0.005, and 0.0005 nominal levels based on 100,000 replicates. For other details see Appendix A.

| MAF=0.3  |            |         |            |          |         |
|----------|------------|---------|------------|----------|---------|
|          | Individual |         | Joint      |          |         |
| level    | Reg        | Levene  | JLS-Fisher | JLS-MinP | LRT     |
| 0.05     | 0.05005    | 0.04988 | 0.04931    | 0.04952  | 0.05144 |
| 0.005    | 0.00490    | 0.00497 | 0.00476    | 0.00488  | 0.00473 |
| 0.0005   | 0.00047    | 0.00056 | 0.00048    | 0.00045  | 0.00045 |
| MAF=0.2  |            |         |            |          |         |
|          | Individual |         | Joint      |          |         |
| level    | Reg        | Levene  | JLS-Fisher | JLS-MinP | LRT     |
| 0.05     | 0.04983    | 0.04788 | 0.04869    | 0.04910  | 0.05060 |
| 0.005    | 0.00475    | 0.00473 | 0.00508    | 0.00481  | 0.00476 |
| 0.0005   | 0.00049    | 0.00054 | 0.00053    | 0.00058  | 0.00047 |
| MAF=0.1  |            |         |            |          |         |
|          | Individual |         | Joint      |          |         |
| level    | Reg        | Levene  | JLS-Fisher | JLS-MinP | LRT     |
| 0.05     | 0.05101    | 0.04766 | 0.04888    | 0.04860  | 0.05254 |
| 0.005    | 0.00476    | 0.00435 | 0.00460    | 0.00452  | 0.00506 |
| 0.0005   | 0.00047    | 0.00058 | 0.00049    | 0.00049  | 0.00053 |
| MAF=0.05 |            |         |            |          |         |
|          | Individual |         | Joint      |          |         |
| level    | Reg        | Levene  | JLS-Fisher | JLS-MinP | LRT     |
| 0.05     | 0.05026    | 0.04183 | 0.04603    | 0.04624  | 0.06130 |
| 0.005    | 0.00473    | 0.00498 | 0.00460    | 0.00524  | 0.00777 |
| 0.0005   | 0.00047    | 0.00064 | 0.00060    | 0.00063  | 0.00107 |
| MAF=0.03 |            |         |            |          |         |
|          | Individual |         | Joint      |          |         |
| level    | Reg        | Levene  | JLS-Fisher | JLS-MinP | LRT     |
| 0.05     | 0.05026    | 0.04788 | 0.04900    | 0.04959  | 0.06722 |
| 0.005    | 0.00523    | 0.00583 | 0.00568    | 0.00592  | 0.01120 |
| 0.0005   | 0.00045    | 0.00110 | 0.00089    | 0.00087  | 0.00231 |

**Table S2. Type 1 error comparison with varied genotypic group sizes.** Type 1 error is presented for the regression location test (Reg), Levene's scale test (Levene), the proposed JLS-Fisher and JLS-minP joint location-scale tests, and the LRT of Cao et al. <sup>2</sup>. The distribution test of Aschard et al. <sup>1</sup> has correct type 1 error by design because it is a permutation-based testing method. Phenotype values for 2,000 independent subjects were simulated under the null model with no genetic association (Model 1 with  $\beta_G = 0, \beta_E = 0, \beta_{GE} = 0$ ) with residual variation from a normal distribution with mean 0 and standard deviation 1. The genotype group sizes were fixed with respect to the smallest group size ( $N_{\text{smallest}} = N_2 = 2, 5, 7, 10, 15$  or 20) for the rare homozygous group and the corresponding Hardy Weinberg equilibrium ( $N_0$  and  $N_1$ ) for the common homozygous and heterozygous groups. Empirical type 1 error rates were calculated at the 0.05, 0.005, and 0.0005 nominal levels based on 100,000 simulation replicates. For other details see Appendix A.

| Group Sizes ( $N_0, N_1, N_2$ )=(1882,116,2) (MAF~0.03)   |            |         |            |          |         |
|-----------------------------------------------------------|------------|---------|------------|----------|---------|
|                                                           | Individual |         | Joint      |          |         |
| level                                                     | Reg        | Levene  | JLS-Fisher | JLS-MinP | LRT     |
| 0.05                                                      | 0.04890    | 0.05369 | 0.05350    | 0.05593  | 0.09134 |
| 0.005                                                     | 0.00485    | 0.01002 | 0.00820    | 0.00862  | 0.02108 |
| 0.0005                                                    | 0.00045    | 0.00221 | 0.00157    | 0.00166  | 0.00582 |
| Group Sizes ( $N_0, N_1, N_2$ )=(1805,190,5) (MAF~0.05)   |            |         |            |          |         |
|                                                           | Individual |         | Joint      |          |         |
| level                                                     | Reg        | Levene  | JLS-Fisher | JLS-MinP | LRT     |
| 0.05                                                      | 0.05039    | 0.03769 | 0.04263    | 0.04262  | 0.05869 |
| 0.005                                                     | 0.00496    | 0.00356 | 0.00399    | 0.00411  | 0.00712 |
| 0.0005                                                    | 0.00043    | 0.00043 | 0.00036    | 0.00042  | 0.00079 |
| Group Sizes ( $N_0, N_1, N_2$ )=(1767,226,7) (MAF~0.06)   |            |         |            |          |         |
|                                                           | Individual |         | Joint      |          |         |
| level                                                     | Reg        | Levene  | JLS-Fisher | JLS-MinP | LRT     |
| 0.05                                                      | 0.05087    | 0.04103 | 0.04578    | 0.04591  | 0.05677 |
| 0.005                                                     | 0.00505    | 0.00406 | 0.00451    | 0.00488  | 0.00617 |
| 0.0005                                                    | 0.00041    | 0.00061 | 0.00047    | 0.00063  | 0.00070 |
| Group Sizes ( $N_0, N_1, N_2$ )=(1730,320,10) (MAF~0.07)  |            |         |            |          |         |
|                                                           | Individual |         | Joint      |          |         |
| level                                                     | Reg        | Levene  | JLS-Fisher | JLS-MinP | LRT     |
| 0.05                                                      | 0.04999    | 0.04524 | 0.04776    | 0.04709  | 0.0542  |
| 0.005                                                     | 0.00474    | 0.00506 | 0.00487    | 0.00502  | 0.00571 |
| 0.0005                                                    | 0.00037    | 0.00071 | 0.00067    | 0.00065  | 0.00071 |
| Group Sizes ( $N_0, N_1, N_2$ )=(1674,311,15) (MAF~0.085) |            |         |            |          |         |
|                                                           | Individual |         | Joint      |          |         |
| level                                                     | Reg        | Levene  | JLS-Fisher | JLS-MinP | LRT     |



|                                                         |            |         |            |          |         |
|---------------------------------------------------------|------------|---------|------------|----------|---------|
| 0.05                                                    | 0.05037    | 0.04539 | 0.04808    | 0.04845  | 0.05263 |
| 0.005                                                   | 0.00486    | 0.00509 | 0.00471    | 0.00464  | 0.00553 |
| 0.0005                                                  | 0.00046    | 0.00055 | 0.00050    | 0.00051  | 0.00061 |
| Group Sizes ( $N_0, N_1, N_2$ )=(1620,360,20) (MAF~0.1) |            |         |            |          |         |
|                                                         | Individual |         | Joint      |          |         |
| level                                                   | Reg        | Levene  | JLS-Fisher | JLS-MinP | LRT     |
| 0.05                                                    | 0.05090    | 0.04704 | 0.04953    | 0.04936  | 0.05319 |
| 0.005                                                   | 0.00514    | 0.00414 | 0.00470    | 0.00472  | 0.00500 |
| 0.0005                                                  | 0.00050    | 0.00057 | 0.00046    | 0.00060  | 0.00045 |

**Table S3. SNP-by-Age interaction effect p-values for variants in Cystic Fibrosis SaKnorm susceptibility loci.** Interaction effect p-values were obtained from linear regression models including the main effects of a SNP and the Age variable, and their interaction effect. Variants were previously identified as associated with meconium ileus<sup>3</sup>. Age (in years) was modeled as either a continuous or dichotomous variable (using different cut points of 16yrs, 18yrs and 20yrs).

| Chr | Gene           | SNP        | BP <sup>a</sup> | Age Continuous | Age Dichotomous: Cut point |       |       |
|-----|----------------|------------|-----------------|----------------|----------------------------|-------|-------|
|     |                |            |                 |                | 16yrs                      | 18yrs | 20yrs |
| 1   | <i>SLC26A9</i> | rs7512462  | 204,166,218     | 0.23           | 0.23                       | 0.29  | 0.52  |
| 1   | <i>SLC26A9</i> | rs4077468  | 204,181,380     | 0.04           | 0.08                       | 0.10  | 0.17  |
| 1   | <i>SLC26A9</i> | rs12047830 | 204,183,322     | 0.02           | 0.01                       | 0.01  | 0.02  |
| 1   | <i>SLC26A9</i> | rs7419153  | 204,183,932     | 0.03           | 0.09                       | 0.07  | 0.11  |
| 5   | <i>SLC9A3</i>  | rs17563161 | 550,624         | 0.003          | 0.03                       | 0.02  | 0.02  |
| X   | <i>SLC6A14</i> | rs12839137 | 115,479,578     | 0.26           | 0.23                       | 0.34  | 0.26  |
| X   | <i>SLC6A14</i> | rs5905283  | 115,479,909     | 0.21           | 0.31                       | 0.26  | 0.36  |
| X   | <i>SLC6A14</i> | rs3788766  | 115,480,867     | 0.009          | 0.03                       | 0.03  | 0.02  |

<sup>a</sup> hg18 assembly (March 2006; NCBI36).

**Table S4. Apical gene-specific association results in the Canadian Gene Modifier Study (CGS) sample (n=1409).** A list of 155 genes was annotated as described in Sun et al. <sup>3</sup>. Genes with gene-based JLS-Fisher p-value < 0.1 are listed in rank order.

| Gene            | Chr | #SNPs <sup>a</sup> | Gene p-value <sup>b</sup> |                         |                  |
|-----------------|-----|--------------------|---------------------------|-------------------------|------------------|
|                 |     |                    | JLS-Fisher                | Location/<br>Regression | Scale/<br>Levene |
| <i>SLC9A3</i>   | 5   | 10                 | 0.0001                    | <0.0001                 | 0.0238           |
| <i>ACY3</i>     | 11  | 7                  | 0.0006                    | 0.0003                  | 0.3233           |
| <i>MREG</i>     | 2   | 37                 | 0.0076                    | 0.0901                  | 0.013            |
| <i>SLC9A3R2</i> | 16  | 10                 | 0.012                     | 0.0696                  | 0.0263           |
| <i>EZR</i>      | 6   | 10                 | 0.0128                    | 0.032                   | 0.0635           |
| <i>SLC46A1</i>  | 17  | 3                  | 0.0136                    | 0.0118                  | 0.2588           |
| <i>CRB1</i>     | 1   | 27                 | 0.017                     | 0.0671                  | 0.0398           |
| <i>LMO7</i>     | 13  | 56                 | 0.0287                    | 0.0462                  | 0.1386           |
| <i>KCNMA1</i>   | 10  | 225                | 0.033                     | 0.293                   | 0.0152           |
| <i>SI</i>       | 3   | 10                 | 0.0461                    | 0.336                   | 0.0207           |
| <i>PTK2</i>     | 8   | 38                 | 0.0506                    | 0.1196                  | 0.0668           |
| <i>LCT</i>      | 2   | 11                 | 0.0565                    | 0.0119                  | 0.9008           |
| <i>SLC34A2</i>  | 4   | 12                 | 0.0617                    | 0.036                   | 0.4264           |
| <i>STXBP3</i>   | 1   | 12                 | 0.0635                    | 0.3105                  | 0.0533           |
| <i>AJAP1</i>    | 1   | 50                 | 0.0703                    | 0.022                   | 0.6287           |
| <i>ATP6VOA4</i> | 7   | 39                 | 0.0734                    | 0.7735                  | 0.0071           |
| <i>DPEP1</i>    | 16  | 2                  | 0.0738                    | 0.0483                  | 0.347            |
| <i>MUC1</i>     | 1   | 3                  | 0.0776                    | 0.0656                  | 0.2099           |
| <i>SLC9A4</i>   | 2   | 55                 | 0.0945                    | 0.042                   | 0.4244           |
| <i>SLC22A12</i> | 11  | 4                  | 0.095                     | 0.145                   | 0.1178           |
| <i>SLC9A3R1</i> | 17  | 8                  | 0.0956                    | 0.0807                  | 0.313            |

<sup>a</sup> The number of GWAS SNPs (MAF>0.02) within ±10 kb of the boundaries of indicated gene.

<sup>b</sup> Permutation-based p-values for the gene. See Material and Methods for details.

**Table S5. Type 1 error control with genotype uncertainty.** Type 1 error is presented for the regression location test (Reg), Levene’s scale test (Levene), and the proposed JLS-Fisher and JLS-minP joint location-scale tests. Simulated true genotypes were converted to probabilistic genotype data using a Dirichlet distribution with scale parameters  $a$  for the correct genotype category and  $(1-a)/2$  for the other two;  $a$  was fixed at values of 1, 0.9, 0.8, 0.7, 0.6 and 0.5, corresponding to group uncertainty ranging from 0% to 50%. Based on the simulated posterior probabilities, the most-likely genotype for each subject was the genotype with the highest posterior probability (i.e. the ‘hard call’). The most-likely genotypes were then used to assess type 1 error control at the 0.05, 0.005 and 0.0005 levels, using 100,000 simulated replicate samples of  $n = 2000$ , under the null model of no genetic association (i.e.  $\beta_G = 0$  and  $\beta_{GE} = 0$ ), and MAF = 0.3 for each level of genotype imputation uncertainty ( $a$ ). Average concordance is the average percent of agreement between true and most-likely genotypes across the simulation replicates. For other details see Appendix A.

| Uncertainty=0% ( $a=1$ ); Average Concordance=1        |            |         |            |          |
|--------------------------------------------------------|------------|---------|------------|----------|
|                                                        | Individual |         | Joint      |          |
| level                                                  | Reg        | Levene  | JLS-Fisher | JLS-MinP |
| 0.05                                                   | 0.05039    | 0.05032 | 0.05005    | 0.05010  |
| 0.005                                                  | 0.00489    | 0.00478 | 0.00498    | 0.00523  |
| 0.0005                                                 | 0.00054    | 0.00052 | 0.00057    | 0.00057  |
| Uncertainty=10% ( $a=0.9$ ); Average Concordance=0.907 |            |         |            |          |
|                                                        | Individual |         | Joint      |          |
| level                                                  | Reg        | Levene  | JLS-Fisher | JLS-MinP |
| 0.05                                                   | 0.05012    | 0.05032 | 0.04964    | 0.04996  |
| 0.005                                                  | 0.00528    | 0.00499 | 0.00535    | 0.00530  |
| 0.0005                                                 | 0.00043    | 0.00053 | 0.00066    | 0.00050  |
| Uncertainty=20% ( $a=0.8$ ); Average Concordance=0.808 |            |         |            |          |
|                                                        | Individual |         | Joint      |          |
| level                                                  | Reg        | Levene  | JLS-Fisher | JLS-MinP |
| 0.05                                                   | 0.04862    | 0.04865 | 0.04780    | 0.04795  |
| 0.005                                                  | 0.00459    | 0.00475 | 0.00424    | 0.00462  |
| 0.0005                                                 | 0.00039    | 0.00049 | 0.00043    | 0.00047  |
| Uncertainty=30% ( $a=0.7$ ); Average Concordance=0.706 |            |         |            |          |
|                                                        | Individual |         | Joint      |          |
| level                                                  | Reg        | Levene  | JLS-Fisher | JLS-MinP |
| 0.05                                                   | 0.05082    | 0.05160 | 0.05081    | 0.05187  |
| 0.005                                                  | 0.00540    | 0.00533 | 0.00534    | 0.00523  |
| 0.0005                                                 | 0.00050    | 0.00051 | 0.00053    | 0.00043  |
| Uncertainty=40% ( $a=0.6$ ); Average Concordance=0.605 |            |         |            |          |
|                                                        | Individual |         | Joint      |          |

|                                                    |            |         |            |          |
|----------------------------------------------------|------------|---------|------------|----------|
| 0.05                                               | 0.04942    | 0.04943 | 0.04895    | 0.04987  |
| 0.005                                              | 0.00502    | 0.00489 | 0.00520    | 0.00505  |
| 0.0005                                             | 0.00054    | 0.00053 | 0.00050    | 0.00048  |
| Uncertainty=50% (a=0.5); Average Concordance=0.508 |            |         |            |          |
|                                                    | Individual |         | Joint      |          |
| level                                              | Reg        | Levene  | JLS-Fisher | JLS-MinP |
| 0.05                                               | 0.05025    | 0.04920 | 0.04967    | 0.04922  |
| 0.005                                              | 0.00495    | 0.00450 | 0.00500    | 0.00481  |
| 0.0005                                             | 0.00047    | 0.00040 | 0.00040    | 0.00047  |

**Table S6. Power comparison under simulation Model 3.** Power is presented for the regression location test (Reg), Levene’s scale test (Levene), the proposed JLS-Fisher and JLS-minP joint location-scale tests, the distribution (Dist.) test of Aschard et al. <sup>1</sup>, and the LRT of Cao et al. <sup>2</sup>. Phenotype values for 4000 independent subjects were simulated under Model 3,  $E[Y] = \beta_{GE1}G \cdot E_1$ , where the MAF of  $G$  was 0.3. Results are presented for scenarios when the interaction effect,  $\beta_{GE1}$ , and exposure ( $E_1$ ) frequency were chosen such that the observed marginal effect of  $G$  was fixed at 10% of the trait standard deviation. Power was calculated at the  $5 \times 10^{-8}$  level based on 500 replicates. For other details see Appendix A.

|             |                               | Individual |        | Joint      |          |       |       |
|-------------|-------------------------------|------------|--------|------------|----------|-------|-------|
| Freq- $E_1$ | Int. Effect ( $\beta_{GE1}$ ) | Reg.       | Levene | JLS-Fisher | JSL-minP | LRT   | Dist. |
| 0.05        | 2                             | 0.010      | 0.110  | 0.406      | 0.090    | 0.996 | 0.916 |
| 0.1         | 1                             | 0.040      | 0.040  | 0.378      | 0.054    | 0.740 | 0.178 |
| 0.2         | 0.5                           | 0.038      | 0.000  | 0.098      | 0.026    | 0.110 | 0.064 |
| 0.3         | 0.33                          | 0.110      | 0.000  | 0.086      | 0.084    | 0.084 | 0.028 |
| 0.5         | 0.2                           | 0.080      | 0.000  | 0.046      | 0.064    | 0.036 | 0.054 |
| 1           | 0.1                           | 0.076      | 0.000  | 0.042      | 0.060    | 0.036 | 0.040 |

**Table S7. Power comparison under simulation Model 3 using p-values estimated based on the approximate asymptotic distribution of the test statistics vs. permutation-based method.** Power is presented for the regression location-only test (Reg), Levene’s scale-only test (Levene), the proposed JLS-Fisher and JLS-minP joint location-scale tests, the distribution (Dist.) test of Aschard et al. <sup>1</sup>, and the LRT of Cao et al. <sup>2</sup>. Phenotype values for 1000 independent subjects were simulated under Model 3,  $E[Y] = \beta_{GE1}G \cdot E_1$ , where the MAF of  $G$  was 0.3 and the exposure variable  $E_1$  was simulated as a Bernoulli variable with frequency=0.05, and the interaction effect  $\beta_{GE1}$  was fixed at 2. Power was calculated at the 0.01 significance level based on 500 replicates. For each replicate, permutation p-values were estimated from 10,000 iterations.

|                           | Individual |        | Joint      |          |       |       |
|---------------------------|------------|--------|------------|----------|-------|-------|
| P-value estimation method | Reg.       | Levene | JLS-Fisher | JLS-minP | LRT   | Dist. |
| Asymptotic                | 0.190      | 0.266  | 0.390      | 0.288    | 0.932 | NA    |
| Permutation               | 0.192      | 0.268  | 0.364      | 0.288    | 0.698 | 0.812 |

**Table S8. Minor allele frequency (MAF) of variants in Cystic Fibrosis SaKnorm susceptibility loci.** Variants were previously identified as associated with meconium ileus<sup>3</sup>. Pediatric subsets (age cutoffs of 16, 18 and 20 years) included for comparison.

| Chr | Gene           | SNP        | BP <sup>a</sup> | Full Sample MAF   | Pediatric Subsets MAF |                             |                |
|-----|----------------|------------|-----------------|-------------------|-----------------------|-----------------------------|----------------|
|     |                |            |                 | All ages (n=1409) | <16yrs (n=653)        | <18yrs <sup>b</sup> (n=753) | <20yrs (n=830) |
| 1   | <i>SLC26A9</i> | rs7512462  | 204,166,218     | 0.41              | 0.38                  | 0.39                        | 0.39           |
| 1   | <i>SLC26A9</i> | rs4077468  | 204,181,380     | 0.42              | 0.38                  | 0.39                        | 0.40           |
| 1   | <i>SLC26A9</i> | rs12047830 | 204,183,322     | 0.49              | 0.48                  | 0.48                        | 0.48           |
| 1   | <i>SLC26A9</i> | rs7419153  | 204,183,932     | 0.37              | 0.39                  | 0.39                        | 0.38           |
| 5   | <i>SLC9A3</i>  | rs17563161 | 550,624         | 0.26              | 0.26                  | 0.26                        | 0.26           |
| X   | <i>SLC6A14</i> | rs12839137 | 115,479,578     | 0.24              | 0.23                  | 0.23                        | 0.24           |
| X   | <i>SLC6A14</i> | rs5905283  | 115,479,909     | 0.49              | 0.51                  | 0.50                        | 0.49           |
| X   | <i>SLC6A14</i> | rs3788766  | 115,480,867     | 0.40              | 0.39                  | 0.39                        | 0.39           |

<sup>a</sup> hg18 assembly (March 2006; NCBI36).

<sup>b</sup> Pediatric subset cutoff (<18yrs) used in Li et al. <sup>4</sup>; subset here only includes unrelated subjects (n=753).

## References

1. Aschard, H., Zaitlen, N., Tamimi, R.M., Lindstrom, S., and Kraft, P. (2013). A nonparametric test to detect quantitative trait Loci where the phenotypic distribution differs by genotypes. *Genetic epidemiology* 37, 323-333.
2. Cao, Y., Wei, P., Bailey, M., Kauwe, J.S., Maxwell, T.J., and Alzheimer's Disease Neuroimaging, I. (2014). A versatile omnibus test for detecting mean and variance heterogeneity. *Genetic epidemiology* 38, 51-59.
3. Sun, L., Rommens, J.M., Corvol, H., Li, W., Li, X., Chiang, T.A., Lin, F., Dorfman, R., Busson, P.F., Parekh, R.V., et al. (2012). Multiple apical plasma membrane constituents are associated with susceptibility to meconium ileus in individuals with cystic fibrosis. *Nature genetics* 44, 562-569.
4. Li, W., Soave, D., Miller, M.R., Keenan, K., Lin, F., Gong, J., Chiang, T., Stephenson, A.L., Durie, P., Rommens, J., et al. (2014). Unraveling the complex genetic model for cystic fibrosis: pleiotropic effects of modifier genes on early cystic fibrosis-related morbidities. *Hum Genet* 133, 151-161.
